# Supplementary material
Source: publisher site journal article supplement (https://www.dovepress.com/article/293160)
Supplement: Supplementary file 1 [file get_supplementary_file.php]

Supplemental Methods

Quantitative Sensory Testing

For quantitative sensory testing during the pre-sedation screening and on the sedation day, the Thermal Sensory Analyzer (TSA-II) will be applied to the participant’s non-dominant volar forearm. The contact area of the thermode is 9 cm2, and the baseline temperature is 32ºC. Thresholds will be obtained from responses to a ramped thermal stimulation (1ºC/s). HPT will be measured by asking the participant to press the button when the sensation of heat transitions to a feeling of pain. HPTT will be measured by asking the participant to press the button when they can no longer tolerate the heat pain. Each threshold (i.e. HPT and HPTT) will be measured four times, and the mean of the last three values will be averaged to compute the threshold. The maximal temperature that can be applied using the TSA-II device is 52ºC, and the maximal thermal energy delivered using this ramping protocol is three orders of magnitude lower than what is required to induce tissue injury1.

Source Estimation Methods

Source estimation of EEG slow waves will utilize Brainstorm running in MATLAB2. T1 MRI scans and corresponding pre-processed EEG will be imported with event times for slow waves. For participants without structural MRI data, the International Consortium for Brain Mapping brain template (ICBM 152) will be used. Forward modeling will rely on OpenMEEG BEM of scalp, skull, and brain. Our surface-constrained source model for deep brain analysis will include cortical and thalamic structures. Source estimates (surface constrained dipoles) based on dynamic statistical parametric mapping will be generated using the diagonal noise covariance and averaged epochs of each individual. A group average will then be generated across all participants and across sham conditions (spontaneous waves) and in-phase stimulation (potentiated waves).

REFERENCES

1. Yarmolenko PS, Moon EJ, Landon C, et al. Thresholds for thermal damage to normal tissues: an update. *Int J Hyperthermia* 2011;27(4):320-43. doi: 10.3109/02656736.2010.534527 [published Online First: 2011/05/20]

2. Tadel F, Baillet S, Mosher JC, et al. Brainstorm: a user-friendly application for MEG/EEG analysis. *Comput Intell Neurosci* 2011;2011:879716. doi: 10.1155/2011/879716
